# Supplementary material
Source: PubMed Central journal article supplement (PMC2924067)
Supplement: supp_M110.115915_jbc.M110.115915-2.pdf [file supp_M110.115915_jbc.M110.115915-2.pdf]

Table S1 Summary of experiments

| factors | exp. No. | lot No.            | MEF                                     | number of cells    | total colonies | established clones | integration free clones |
|---------|----------|--------------------|-----------------------------------------|--------------------|----------------|--------------------|-------------------------|
| 3F      | 1        | 1                  | B6 x B6                                 | $7.5 \times 10^5$  | 3              | 0                  | 0                       |
|         |          | 2                  |                                         | $7.5 \times 10^5$  | 4              | 0                  | 0                       |
|         |          | 3                  |                                         | $1.5 \times 10^6$  | 15             | 0                  | 0                       |
|         |          | 4                  |                                         | $1.5 \times 10^6$  | 6              | 0                  | 0                       |
|         |          | 5                  |                                         | $7.5 \times 10^5$  | 23             | 4                  | 3                       |
|         |          | 6                  |                                         | $2.6 \times 10^6$  | 1              | 1*                 | 0                       |
|         |          | 7                  |                                         | $7.5 \times 10^5$  | 8              | 0                  | 0                       |
|         |          | 8                  |                                         | $7.5 \times 10^5$  | 8              | 0                  | 0                       |
|         | 2        | 9                  | B6 x B6                                 | $3.75 \times 10^5$ | 1              | 1                  | 0                       |
|         |          | 10                 |                                         | $3.75 \times 10^5$ | 0              | 0                  | 0                       |
|         |          | 11                 |                                         | $3.75 \times 10^5$ | 0              | 0                  | 0                       |
|         |          | 12                 |                                         | $3.75 \times 10^5$ | 0              | 0                  | 0                       |
|         |          | 13                 |                                         | $3.75 \times 10^5$ | 0              | 0                  | 0                       |
|         |          | 14                 |                                         | $3.75 \times 10^5$ | 1              | 1                  | 0                       |
|         |          | 15                 |                                         | $3.75 \times 10^5$ | 0              | 0                  | 0                       |
|         |          | 16                 |                                         | $3.75 \times 10^5$ | 1              | 1                  | 0                       |
|         | 3        | 17                 | B6-Tg(CAG-EGFP)<br>x<br>B6-Tg(CAG-EGFP) | $3.75 \times 10^5$ | 1              | 0                  | 0                       |
|         |          | 18                 |                                         | $3.75 \times 10^5$ | 5              | 2                  | 2                       |
|         |          | 19                 |                                         | $3.75 \times 10^5$ | 1              | 1                  | 0                       |
|         |          | 20                 |                                         | $3.75 \times 10^5$ | 1              | 0                  | 0                       |
|         |          | 21                 |                                         | $3.75 \times 10^5$ | 0              | 0                  | 0                       |
|         |          | 22                 |                                         | $3.75 \times 10^5$ | 0              | 0                  | 0                       |
|         |          | 23                 |                                         | $3.75 \times 10^5$ | 0              | 0                  | 0                       |
|         |          | 24                 |                                         | $3.75 \times 10^5$ | 0              | 0                  | 0                       |
|         | 4        | 25                 | B6<br>x<br>B6-Tg(CAG-EGFP)              | $3.75 \times 10^5$ | 1              | 1                  | 1                       |
|         |          | 26                 |                                         | $3.75 \times 10^5$ | 0              | 0                  | 0                       |
|         |          | 27                 |                                         | $3.75 \times 10^5$ | 0              | 0                  | 0                       |
|         |          | 28                 |                                         | $3.75 \times 10^5$ | 1              | 0                  | 0                       |
|         |          | 29                 |                                         | $3.75 \times 10^5$ | 0              | 0                  | 0                       |
|         |          | 30                 |                                         | $3.75 \times 10^5$ | 1              | 0                  | 0                       |
|         |          | 31                 |                                         | $3.75 \times 10^5$ | 1              | 0                  | 0                       |
|         |          | 32                 |                                         | $3.75 \times 10^5$ | 1              | 0                  | 0                       |
|         |          | 33                 |                                         | $3.75 \times 10^5$ | 15             | 6                  | 6                       |
|         |          | 34                 |                                         | $3.75 \times 10^5$ | 14             | 6                  | 6                       |
|         |          | 35                 |                                         | $3.75 \times 10^5$ | 1              | 0                  | 0                       |
|         |          | 36                 |                                         | $3.75 \times 10^5$ | 0              | 0                  | 0                       |
|         |          | 37                 |                                         | $3.75 \times 10^5$ | 0              | 0                  | 0                       |
|         |          | 38                 |                                         | $3.75 \times 10^5$ | 0              | 0                  | 0                       |
|         |          | 39                 |                                         | $3.75 \times 10^5$ | 0              | 0                  | 0                       |
|         |          | 40                 |                                         | $3.75 \times 10^5$ | 0              | 0                  | 0                       |
|         |          | 41                 |                                         | $3.75 \times 10^5$ | 0              | 0                  | 0                       |
|         | 42       | $3.75 \times 10^5$ | 0                                       | 0                  | 0              |                    |                         |
|         | 43       | $3.75 \times 10^5$ | 0                                       | 0                  | 0              |                    |                         |
|         | 44       | $3.75 \times 10^5$ | 0                                       | 0                  | 0              |                    |                         |
|         | 45       | $3.75 \times 10^5$ | 0                                       | 0                  | 0              |                    |                         |

|    |   |       |         |                    |                    |       |     |
|----|---|-------|---------|--------------------|--------------------|-------|-----|
|    |   | 46    |         | $3.75 \times 10^5$ | 0                  | 0     | 0   |
|    |   | 47    |         | $3.75 \times 10^5$ | 0                  | 0     | 0   |
|    |   | 48    |         | $3.75 \times 10^5$ | 0                  | 0     | 0   |
|    |   | 49    |         | $3.75 \times 10^5$ | 0                  | 0     | 0   |
|    |   | total |         | $2.48 \times 10^7$ | 114                | 23    | 18  |
| 4F | 1 | 1     | B6 x B6 | $7.5 \times 10^5$  | 9                  | 4     | 1   |
|    |   | 2     |         | $7.5 \times 10^5$  | 553                | 12    | 0   |
|    |   | 3     |         | $1.5 \times 10^6$  | 125                | 16    | 1   |
|    |   | 4     |         | $1.5 \times 10^6$  | 64                 | 16    | 0   |
|    |   | 5     |         | $7.5 \times 10^5$  | 7                  | 0     | 0   |
|    |   | 6     |         | $7.5 \times 10^5$  | 13                 | 0     | 0   |
|    |   | 7     |         | $7.5 \times 10^5$  | 11                 | 0     | 0   |
|    | 2 | 8     | B6 x B6 | $7.5 \times 10^5$  | 82                 | 8     | 1   |
|    |   | 9     |         | $7.5 \times 10^5$  | 29                 | 8     | 2   |
|    |   | 10    |         | $7.5 \times 10^5$  | 265                | 26    | 0   |
|    |   | 11    |         | $7.5 \times 10^5$  | 43                 | 18    | 6   |
|    |   | 12    |         | $3.75 \times 10^5$ | 53                 | 15    | 0   |
|    |   | 13    |         | $3.75 \times 10^5$ | 38                 | 11    | 0   |
|    |   |       | total   |                    | $1.05 \times 10^7$ | 1,292 | 134 |

\* Clone 2A-3F-2 (Fig.3A and B), which contained short fragment covering the 5' region of Oct3/4, ~1,000bp.
