# Supplementary material
Source: PubMed Central journal article supplement (PMC2924067)
Supplement: supp_M110.115915_jbc.M110.115915-3.pdf [file supp_M110.115915_jbc.M110.115915-3.pdf]

Table S2

Coefficient of determination ( $r^2$ ) values between 2A-3FiPS and 4FiPS cells

|                              | <b>2A-3F-1<sup>a1)</sup></b> | <b>2A-3F-3<sup>b1)</sup></b> | <b>2A-3F-4<sup>c1)</sup></b> | <b>2A-4F-1</b> | <b>2A-4F-33</b> | <b>R-4F-1z-1</b> | <b>B6MEF</b> |
|------------------------------|------------------------------|------------------------------|------------------------------|----------------|-----------------|------------------|--------------|
| <b>2A-3F-1<sup>a2)</sup></b> | <b>0.990</b>                 | <b>0.966</b>                 | <b>0.974</b>                 | <b>0.968</b>   | <b>0.974</b>    | <b>0.943</b>     | <b>0.570</b> |
| <b>2A-3F-3<sup>b2)</sup></b> |                              | <b>0.984</b>                 | <b>0.978</b>                 | <b>0.949</b>   | <b>0.964</b>    | <b>0.947</b>     | <b>0.549</b> |
| <b>2A-3F-4<sup>c2)</sup></b> |                              |                              | <b>0.986</b>                 | <b>0.956</b>   | <b>0.986</b>    | <b>0.951</b>     | <b>0.575</b> |

Expression analysis was performed using HiCEP method according to a previous report (1,2).  
Germline transmission of R-4F-1z-1 was confirmed.

a1), a2), b1), b2), c1) c2), <sup>1)</sup> and <sup>2)</sup> for each iPS clone were prepared independently.

#### References

1. Fukumura, R., Takahashi, H., Saito, T., Tsutsumi, Y., Fujimori, A., Sato, S., Tatsumi, K., Araki, R., and Abe, M. (2003) *Nucleic Acids Res.* **31**, e94
2. Araki, R., Fukumura, R., Sasaki, N., Kasama, Y., Suzuki, N., Takahashi, H., Tabata, Y., Saito, T., and Abe, M. (2006) *Stem Cells* **24**, 2522-2528
