# Supplementary material
Source: PubMed Central journal article supplement (PMC2924067)

Figure S7

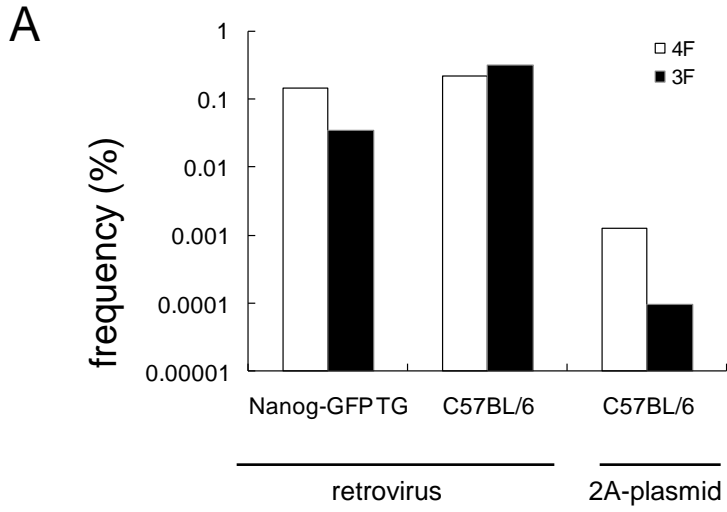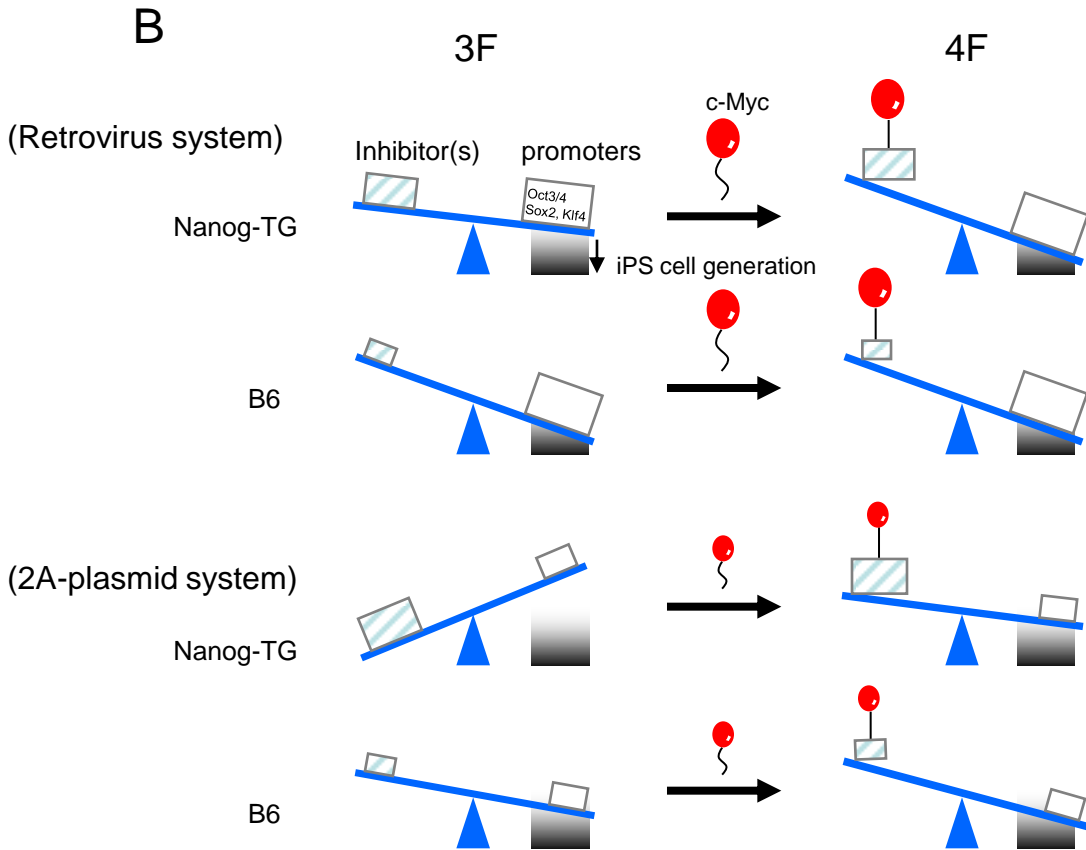

Supplement: supp_M110.115915_jbc.M110.115915-10.pdf [file supp_M110.115915_jbc.M110.115915-10.pdf]

Figure S1

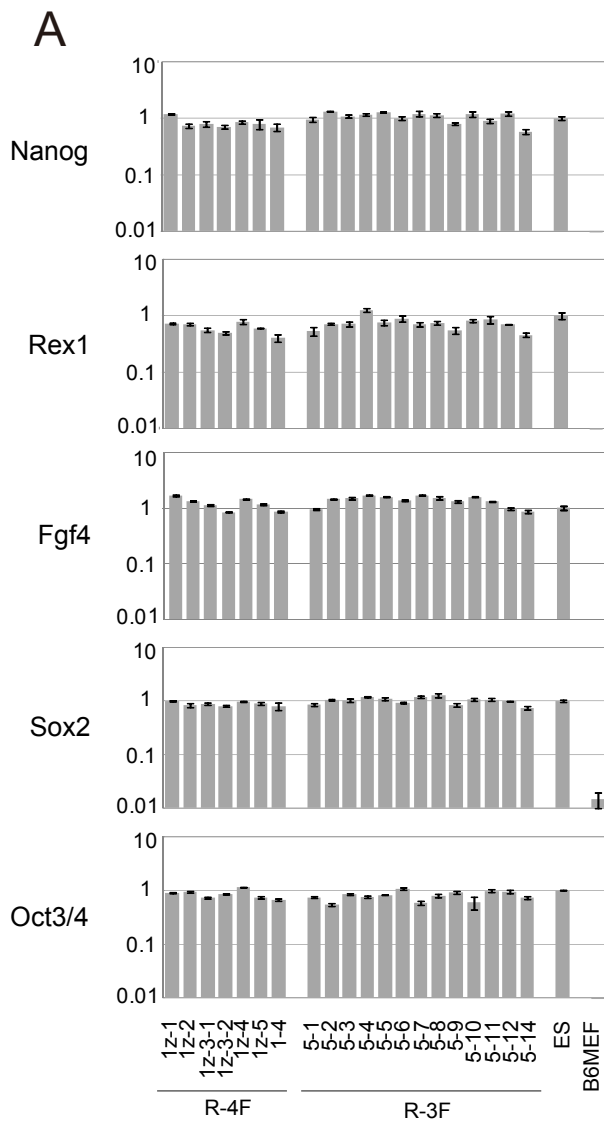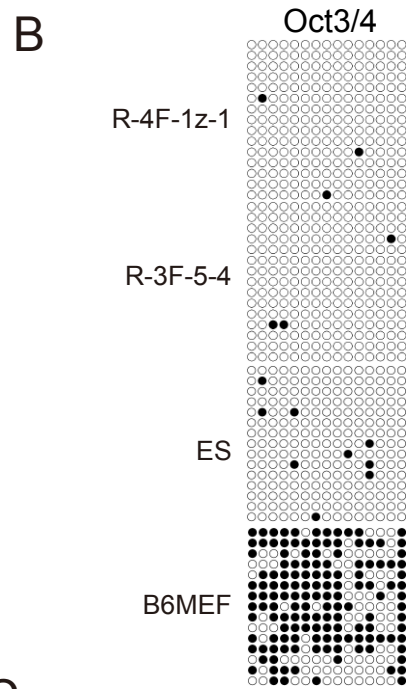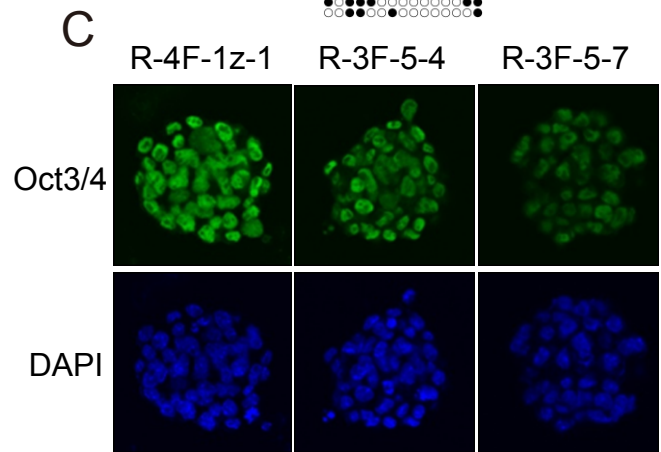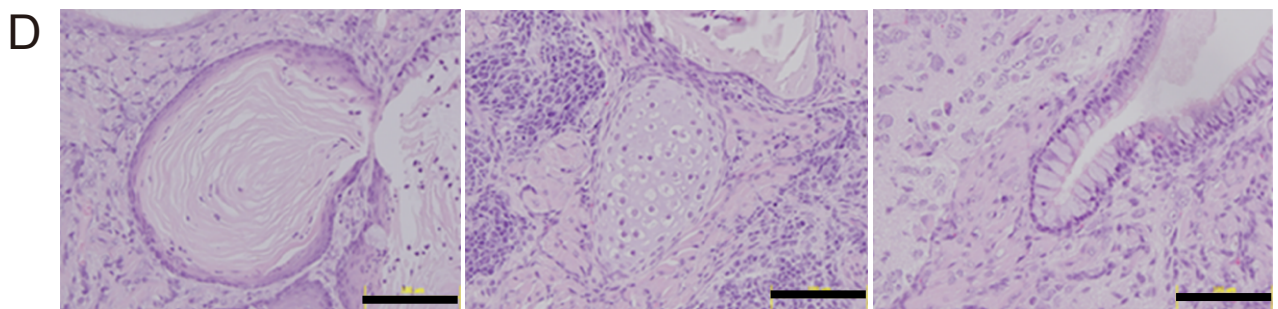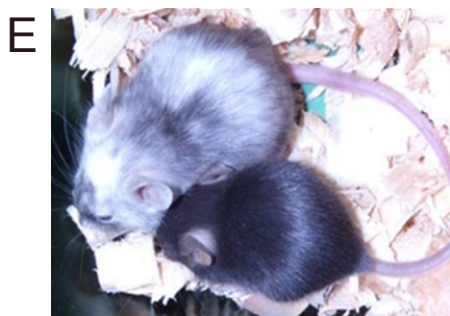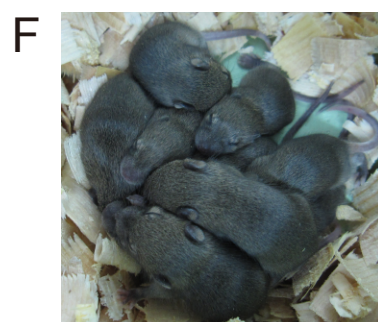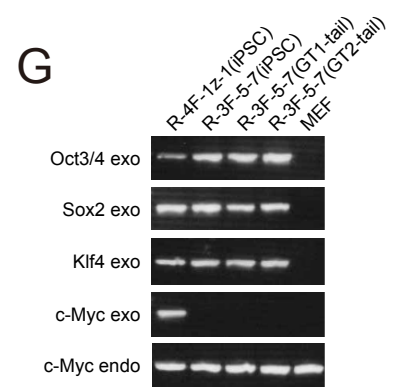

Supplement: supp_M110.115915_jbc.M110.115915-4.pdf [file supp_M110.115915_jbc.M110.115915-4.pdf]

Figure S2

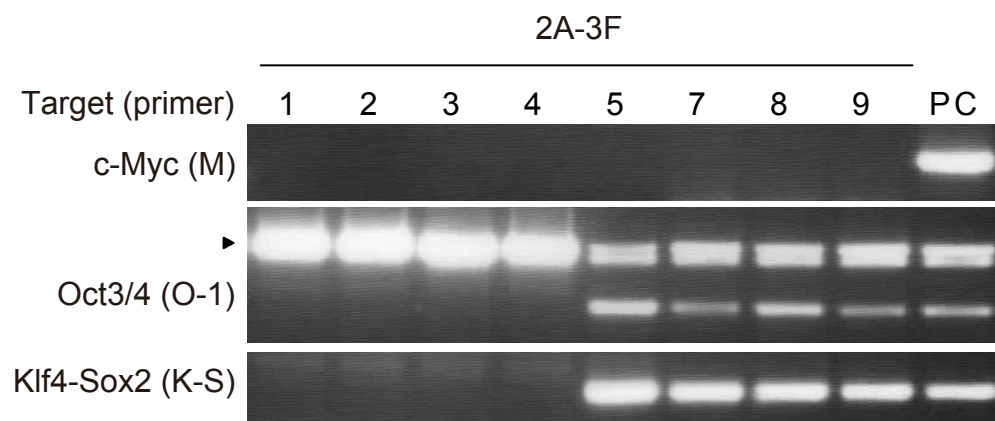

Supplement: supp_M110.115915_jbc.M110.115915-5.pdf [file supp_M110.115915_jbc.M110.115915-5.pdf]

Figure S3

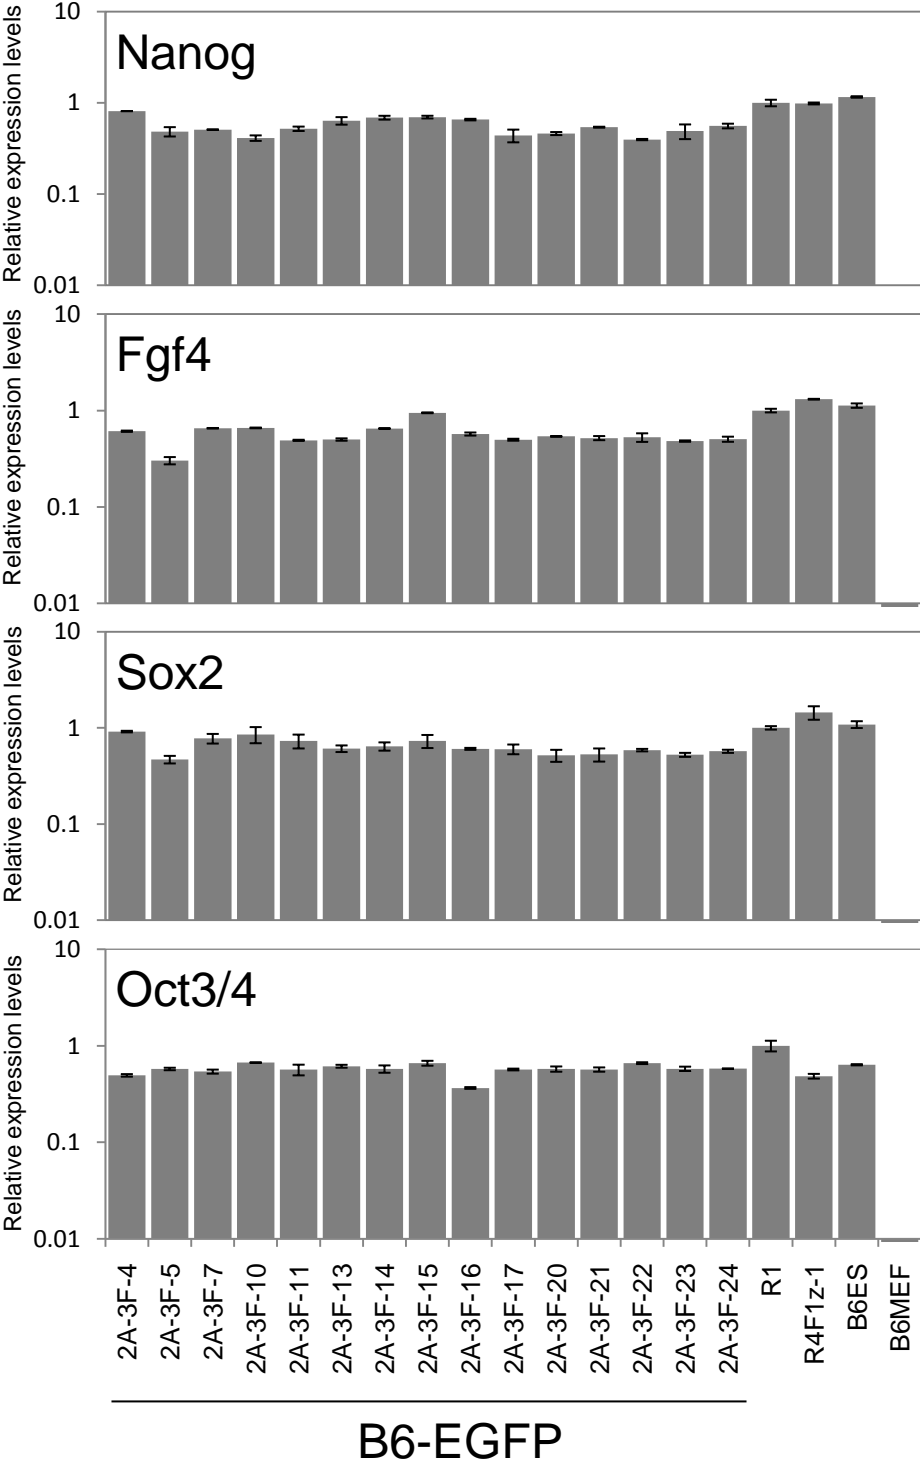

Supplement: supp_M110.115915_jbc.M110.115915-6.pdf [file supp_M110.115915_jbc.M110.115915-6.pdf]

Figure S4

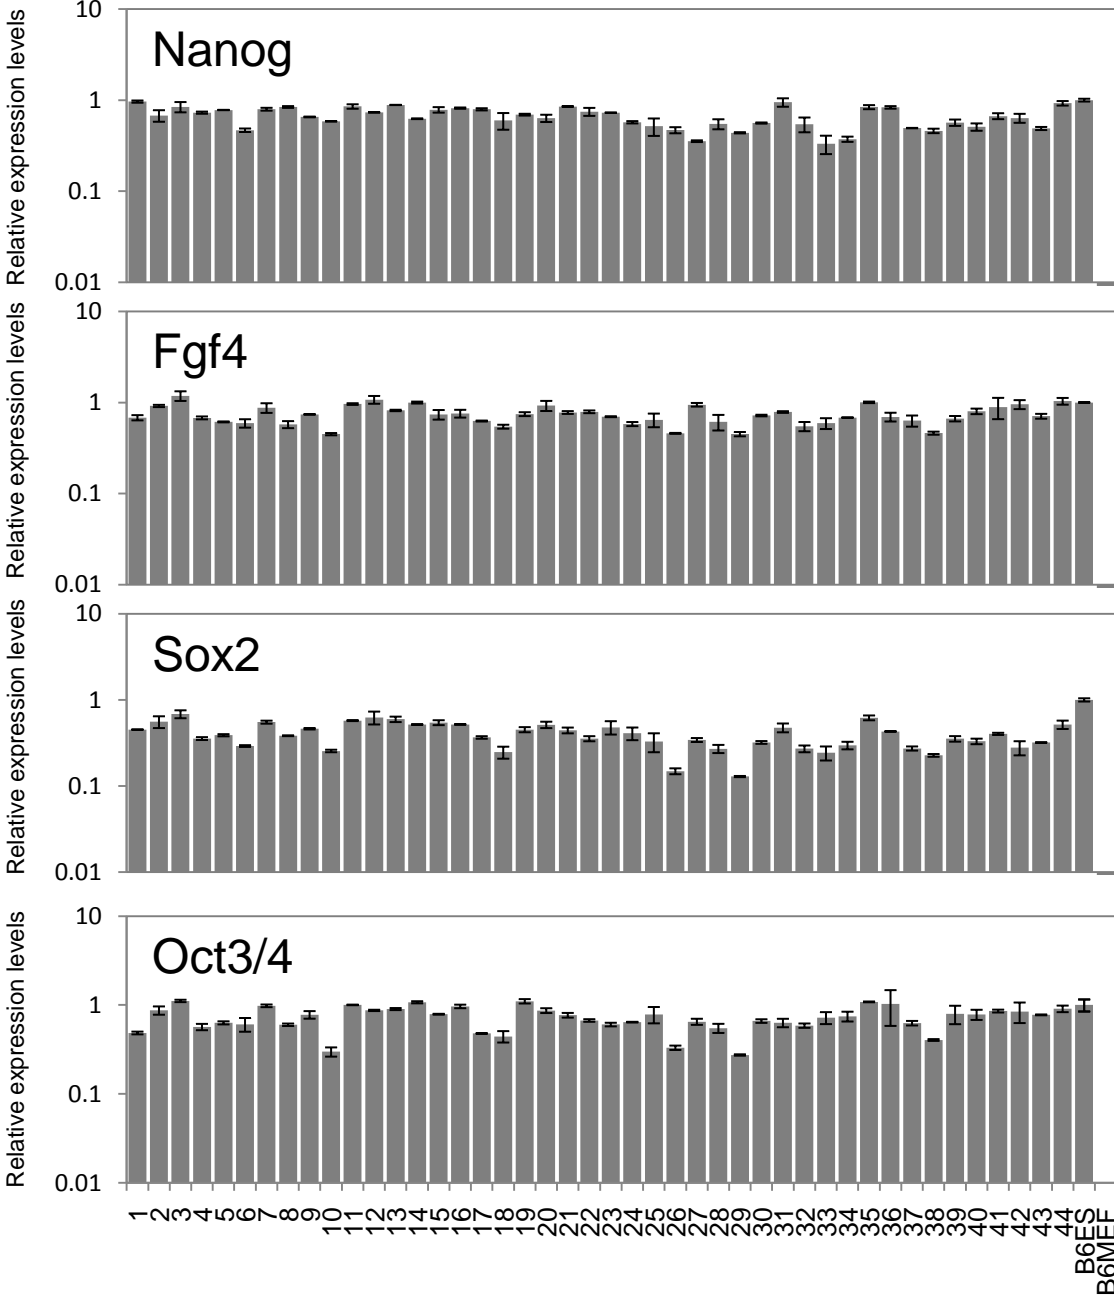

Supplement: supp_M110.115915_jbc.M110.115915-7.pdf [file supp_M110.115915_jbc.M110.115915-7.pdf]

Figure S5

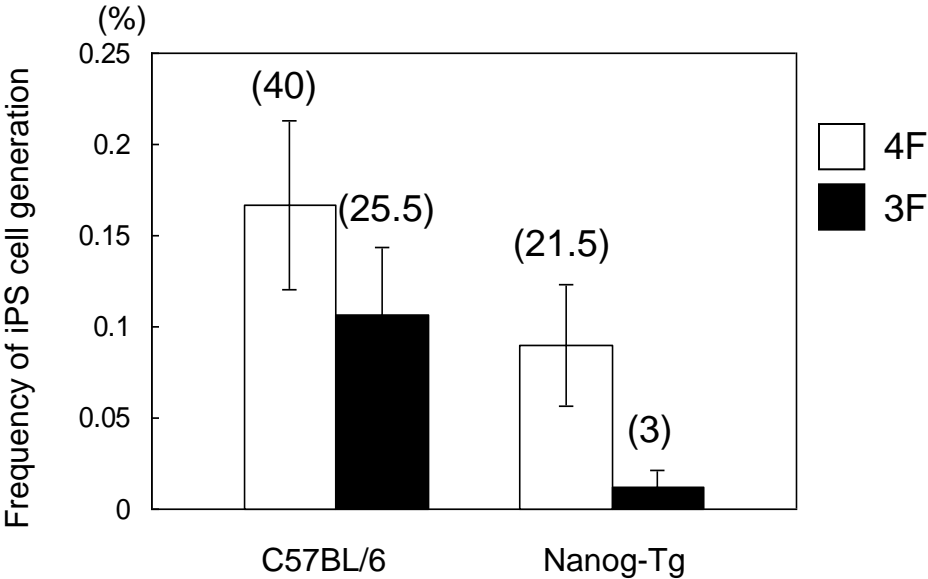

( ): The number of iPSC-positive wells among 96 wells is indicated.

Supplement: supp_M110.115915_jbc.M110.115915-8.pdf [file supp_M110.115915_jbc.M110.115915-8.pdf]

Figure S6

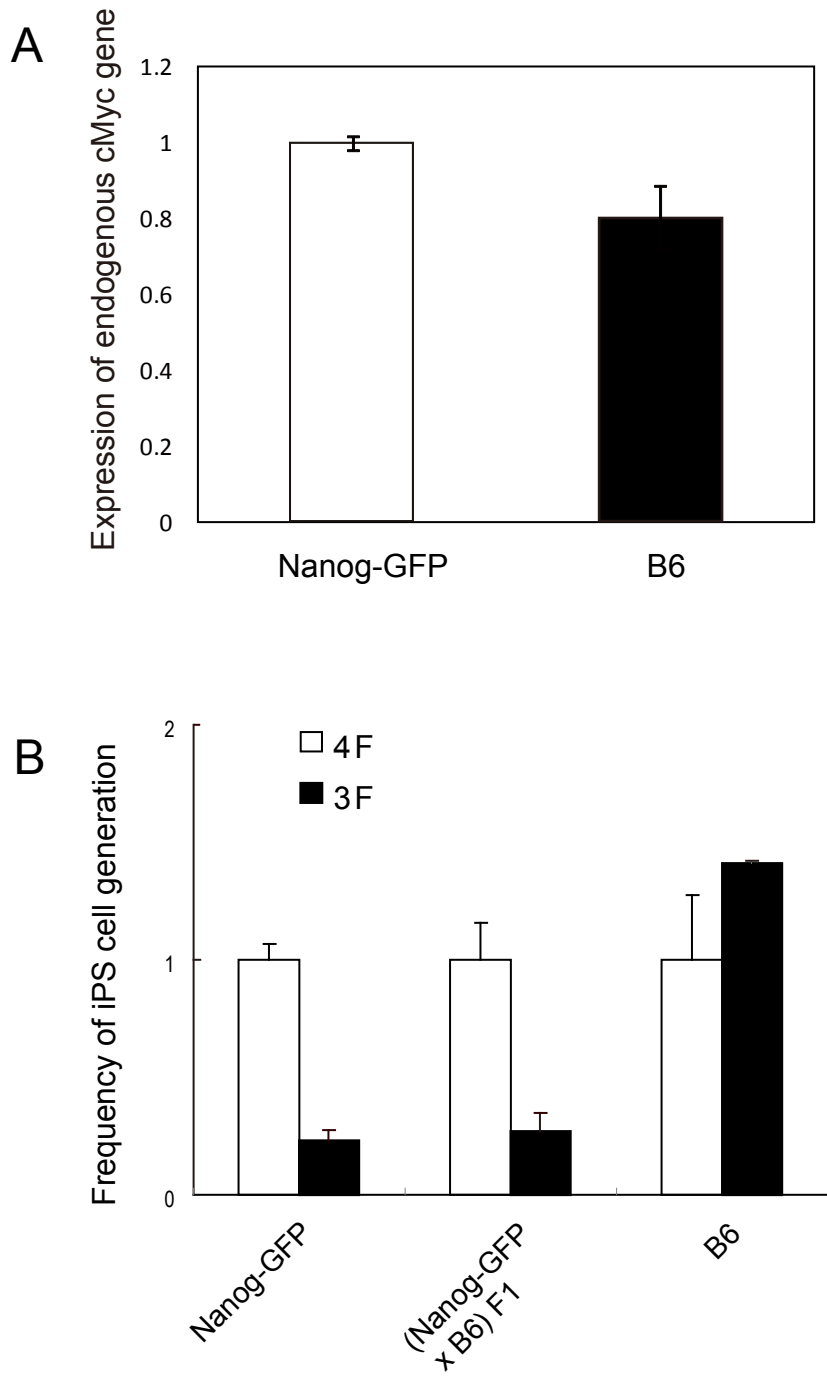

Supplement: supp_M110.115915_jbc.M110.115915-9.pdf [file supp_M110.115915_jbc.M110.115915-9.pdf]
